# Supplementary material
Source: Springer Nature journal article supplement (https://www.springermedizin.de/resource/supplementary/12881_2011_934_MOESM8_ESM.pdf/9451578)

**A*****BCL2L13* rs2587100 (C/G) - Patient 13**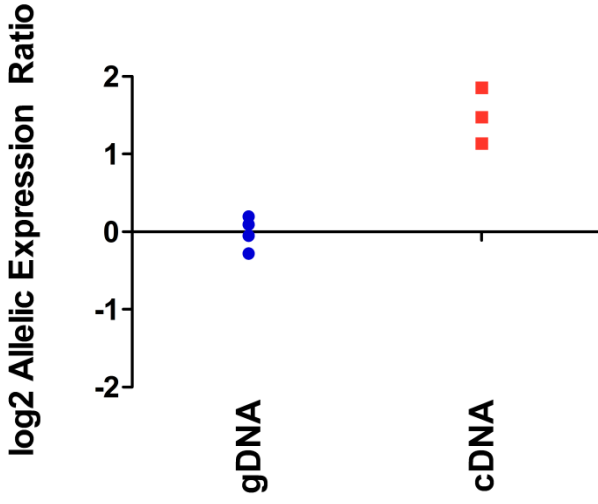**B*****BID* rs11538 (T/C) - Patient 57**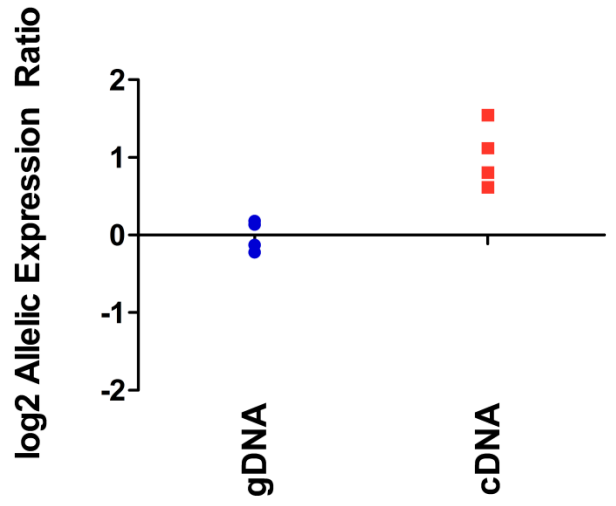**C*****MICAL3* rs5992854 (T/C) - Patient 38**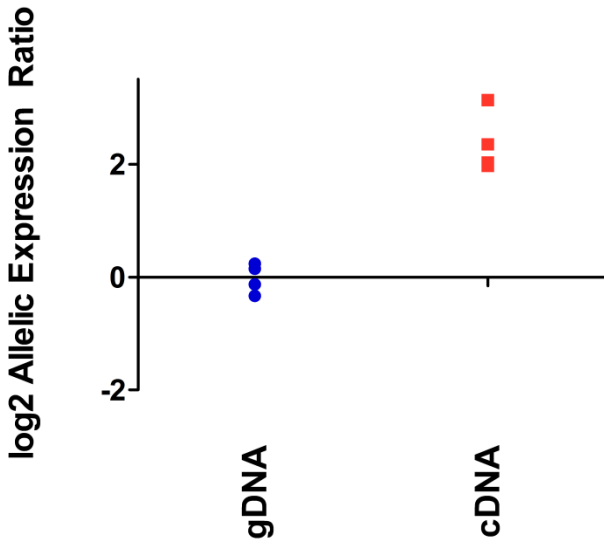

Supplement: MOESM8 [file 9451578]
